# Supplementary material
Source: Research Square preprint supplement (doi:10.21203/rs.3.rs-8690892/v1)
Supplement: Supplementary file 1 [file dc8e9a44048aa293af4d4613.docx]

**Supplementary material**

**Table S1. Data on Age, Sex, Cobb Angle, Ultrasound Coronal Angle, and Measurement Time of Included Subjects.**

| Years | Gender | Cobb angle(°) | Ultrasound curve angle(°) | Operator | | Measurement time (min) | |
| --- | --- | --- | --- | --- | --- | --- | --- |
|  |  |  |  | Operator A | Operator  B | UCA(min) | Cobb(min) |
| 11 | Female | 9 | 9.1 | 9.3 | 8.9 | 3.5 | 30 |
| 14 | Female | 5 | 8.6 | 9 | 8.2 | 3.8 | 36 |
| 17 | Male | 7 | 7.7 | 7.5 | 7.9 | 3.6 | 42 |
| 16 | Female | 9 | 10.8 | 11 | 10.6 | 3.7 | 30 |
| 14 | Male | 30 | 31 | 32 | 30 | 3.5 | 38 |
| 15 | Female | 6 | 7.3 | 7.2 | 7.4 | 3.9 | 45 |
| 15 | Female | 16 | 17.2 | 18 | 16.4 | 4.5 | 42 |
| 14 | Female | 10 | 11.6 | 13 | 10.2 | 5.6 | 44 |
| 15 | Male | 15 | 13.5 | 10 | 17 | 3.8 | 45 |
| 15 | Female | 14 | 15.3 | 14.6 | 16 | 3.7 | 46 |
| 14 | Male | 17 | 15.1 | 15 | 15.2 | 3.9 | 28 |
| 16 | Male | 17 | 21.7 | 23 | 20.4 | 4.2 | 27 |
| 15 | Female | 18 | 16.8 | 15.6 | 18 | 6.1 | 28 |
| 18 | Male | 12 | 13.6 | 10 | 17.2 | 9.6 | 27 |
| 15 | Male | 11 | 10.6 | 10 | 11.2 | 8.6 | 30 |
| 15 | Female | 11 | 12.1 | 11.1 | 13.1 | 8.5 | 35 |
| 12 | Male | 10 | 16.7 | 15 | 18.4 | 8.9 | 36 |
| 15 | Male | 8 | 10.0 | 10 | 10.0 | 8.5 | 38 |
| 12 | Female | 7 | 8.3 | 10 | 6.6 | 9.5 | 37 |
| 15 | Male | 12 | 12.4 | 10 | 14.8 | 7.5 | 39 |
| 17 | Male | 4 | 8.1 | 9 | 7.2 | 4.5 | 34 |
| 15 | Male | 10 | 11.4 | 11.3 | 11.5 | 8.5 | 36 |
| 15 | Female | 6 | 6.5 | 5 | 8 | 7.5 | 38 |
| 13 | Male | 13 | 11.9 | 11 | 12.8 | 7.6 | 37 |
| 14 | Female | 31 | 31.4 | 31 | 31.8 | 9.8 | 34 |
| 14 | Female | 24 | 10.9 | 10 | 11.8 | 9 | 38 |
| 15 | Male | 10 | 10.2 | 9 | 11.4 | 10 | 39 |
| 18 | Female | 12 | 11.7 | 13 | 10.4 | 12 | 37 |
| 15 | Male | 8 | 12.7 | 11 | 14.4 | 13.3 | 38 |
| 14 | Male | 13 | 7.1 | 6.5 | 7.7 | 12 | 39 |
| 13 | Female | 13 | 12.6 | 12.5 | 12.7 | 9.8 | 37 |
| 14 | Male | 8 | 9.8 | 11.5 | 8.1 | 8 | 36 |
| 14 | Female | 8 | 14.5 | 15.5 | 13.5 | 9 | 34 |
| 12 | Female | 3 | 4.6 | 3.8 | 5.4 | 8.8 | 35 |
| 13 | Female | 9 | 11.3 | 11.5 | 11.1 | 7.8 | 35 |
| 15 | Male | 2 | 6.7 | 5.5 | 7.9 | 7 | 38 |

**Table S1(Continued). Data on Age, Sex, Cobb Angle, Ultrasound Coronal Angle, and Measurement Time of Included Subjects.**

| Years | Gender | Cobb angle(°) | Ultrasound curve angle(°) | Operator | | Measurement time (min) | |
| --- | --- | --- | --- | --- | --- | --- | --- |
|  |  |  |  | Operator A | Operator  B | UCA(min) | Cobb(min) |
| 13 | Male | 12 | 16.6 |  |  | 8.5 | 38 |
| 15 | Female | 10 | 7.2 |  |  | 5.2 | 37 |
| 15 | Male | 7 | 10.3 |  |  | 6 | 34 |
| 14 | Male | 34 | 33.8 |  |  | 4.5 | 35 |
| 15 | Female | 20 | 21.2 |  |  | 3.2 | 35 |
| 17 | Female | 20 | 19.9 |  |  | 3.5 | 36 |
| 14 | Female | 31 | 30.8 |  |  | 3.8 | 36 |
| 14 | Female | 38 | 36.5 |  |  | 5.2 | 34 |
| 15 | Female | 14 | 14.3 |  |  | 5.0 | 35 |
| 18 | Male | 30 | 28.6 |  |  | 4.2 | 31 |
| 15 | Male | 19 | 18.4 |  |  | 4.6 | 32 |
| 13 | Female | 16 | 15.9 |  |  | 4.0 | 34 |
| 19 | Female | 15 | 16.2 |  |  | 5.0 | 34 |
| 16 | Male | 15 | 15.0 |  |  | 5.1 | 38 |
| 15 | Female | 11 | 10.5 |  |  | 5.2 | 37 |
| 14 | Female | 10 | 10.4 |  |  | 4.5 | 38 |
| 13 | Female | 13 | 13.7 |  |  | 6.2 | 39 |
| 15 | Male | 21 | 19.3 |  |  | 4.5 | 39 |
| 12 | Male | 11 | 12.2 |  |  | 3.6 | 37 |
| 15 | Female | 12 | 12.6 |  |  | 7.8 | 36 |
| 14 | Male | 3 | 5.2 |  |  | 4.5 | 40 |
| 13 | Male | 14 | 16.3 |  |  | 3.5 | 45 |
| 13 | Male | 15 | 14.0 |  |  | 7.8 | 50 |
| 11 | Female | 26 | 24.7 |  |  | 5.1 | 58 |
| 14 | Female | 23 | 22.8 |  |  | 5.2 | 38 |
| 17 | Female | 23 | 20.2 |  |  | 3.6 | 39 |
| 16 | Female | 18 | 17.1 |  |  | 4.5 | 40 |
| 14 | Female | 15 | 14.4 |  |  | 7.9 | 45 |
| 15 | Male | 34 | 31.3 |  |  | 3.9 | 36 |
| 15 | Male | 13 | 12.1 |  |  | 4.8 | 39 |
| 14 | Male | 24 | 25.3 |  |  | 4 | 37 |
| 15 | Male | 19 | 19.1 |  |  | 4.2 | 38 |
| 15 | Male | 16 | 15.3 |  |  | 4.3 | 40 |
| 14 | Female | 22 | 21.3 |  |  | 4.3 | 39 |
| 16 | Female | 7 | 8.4 |  |  | 4.3 | 40 |
| 15 | Female | 15 | 16.3 |  |  | 4.5 | 38 |
| 18 | Female | 39 | 39.5 |  |  | 4.2 | 39 |
| 15 | Female | 10 | 10.5 |  |  | 4.2 | 39 |

**Table S1(Continued). Data on Age, Sex, Cobb Angle, Ultrasound Coronal Angle, and Measurement Time of Included Subjects.**

| Years | Gender | Cobb angle(°) | Ultrasound curve angle(°) | Operator | | Measurement time (min) | |
| --- | --- | --- | --- | --- | --- | --- | --- |
|  |  |  |  | Operator A | Operator  B | UCA(min) | Cobb(min) |
| 15 | Female | 9 | 11.5 |  |  | 5.4 | 37 |
| 12 | Female | 11 | 13.1 |  |  | 6.7 | 38 |
| 15 | Female | 16 | 17.7 |  |  | 5.7 | 40 |
| 12 | Female | 8 | 8.0 |  |  | 4.2 | 41 |
| 15 | Female | 19 | 17.9 |  |  | 4.1 | 36 |
| 17 | Female | 25 | 25.3 |  |  | 4.1 | 38 |
| 15 | Female | 9 | 8.7 |  |  | 3.9 | 37 |
| 15 | Female | 9 | 9.8 |  |  | 3.8 | 39 |
| 13 | Female | 19 | 17.8 |  |  | 4.5 | 39 |
| 14 | Female | 16 | 15.9 |  |  | 3.7 | 34 |
| 14 | Male | 17 | 16 |  |  | 3.8 | 36 |
| 15 | Male | 19.5 | 18 |  |  | 7.5 | 39 |
| 18 | Male | 23.5 | 26 |  |  | 8.4 | 38 |
| 15 | Male | 26 | 23.5 |  |  | 7.6 | 37 |
| 14 | Male | 10.5 | 10 |  |  | 5.6 | 39 |
| 13 | Female | 7 | 8 |  |  | 4.6 | 39 |
| 14 | Female | 9.5 | 10 |  |  | 8.6 | 38 |
| 14 | Female | 8.5 | 9 |  |  | 12.5 | 33 |
| 12 | Female | 10 | 13 |  |  | 13 | 32 |
| 13 | Female | 9 | 14 |  |  | 10 | 33 |
| 15 | Male | 7 | 9 |  |  | 9.5 | 31 |
| 14 | Male | 6 | 9 |  |  | 8.5 | 33 |
| 13 | Male | 8 | 9 |  |  | 7 | 31 |
| 15 | Female | 7 | 8 |  |  | 8 | 32 |
| 15 | Female | 9 | 13 |  |  | 8.5 | 32 |
| 14 | Female | 31 | 30 |  |  | 8.5 | 34 |
| 15 | Female | 12 | 11.5 |  |  | 9.5 | 35 |
| 17 | Male | 15 | 15.9 |  |  | 7.5 | 36 |
| 14 | Male | 13 | 13.8 |  |  | 8.5 | 33 |
| 14 | Male | 14 | 16.5 |  |  | 7.5 | 31 |
| 15 | Male | 7 | 7.9 |  |  | 7.5 | 34 |
| 18 | Male | 9 | 9.5 |  |  | 8.6 | 32 |
| 15 | Male | 8 | 8.5 |  |  | 8.6 | 35 |
| 13 | Male | 5 | 8 |  |  | 8.1 | 38 |
| 19 | Male | 10 | 13 |  |  | 7.5 | 39 |
| 16 | Female | 8 | 9 |  |  | 8.5 | 39 |
| 15 | Female | 9 | 12 |  |  | 9.5 | 41 |
| 14 | Female | 5 | 9 |  |  | 12.5 | 46 |

**Table S1(Continued). Data on Age, Sex, Cobb Angle, Ultrasound Coronal Angle, and Measurement Time of Included Subjects.**

| Years | Gender | Cobb angle(°) | Ultrasound curve angle(°) | Operator | | Measurement time (min) | |
| --- | --- | --- | --- | --- | --- | --- | --- |
|  |  |  |  | Operator A | Operator  B | UCA(min) | Cobb(min) |
| 13 | Female | 6 | 8 |  |  | 10 | 45 |
| 15 | Male | 9 | 14 |  |  | 13.5 | 42 |
| 12 | Male | 9 | 12 |  |  | 13 | 45 |
| 15 | Male | 9 | 14 |  |  | 15 | 46 |
| 14 | Male | 7 | 9 |  |  | 8 | 41 |
| 13 | Male | 7 | 9 |  |  | 7 | 44 |
| 13 | Male | 6 | 9 |  |  | 9 | 35 |
| 11 | Male | 11 | 15 |  |  | 8 | 36 |
| 14 | Male | 13 | 16 |  |  | 8.5 | 34 |
| 17 | Female | 15 | 18 |  |  | 9.6 | 36 |
| 16 | Female | 12 | 11 |  |  | 8.6 | 35 |
| 14 | Female | 11 | 9.5 |  |  | 7.9 | 36 |
| 15 | Female | 10 | 11.3 |  |  | 8.6 | 31 |
| 15 | Male | 9 | 8.8 |  |  | 7.5 | 33 |
| 14 | Male | 6 | 7.6 |  |  | 7.6 | 32 |
| 15 | Male | 11 | 11.8 |  |  | 8.5 | 32 |
| 15 | Male | 25 | 23.8 |  |  | 7.5 | 35 |
| 14 | Male | 12 | 10.6 |  |  | 7.6 | 34 |
| 16 | Male | 13 | 11.2 |  |  | 8.5 | 32 |
| 15 | Female | 15 | 13.4 |  |  | 8.5 | 31 |
| 18 | Female | 14 | 11.6 |  |  | 7.5 | 35 |
| 15 | Female | 15 | 14.9 |  |  | 7.5 | 34 |
| 15 | Female | 16 | 15.9 |  |  | 8.5 | 35 |
| 12 | Male | 19 | 17.5 |  |  | 7.5 | 35 |
| 15 | Male | 26 | 22.8 |  |  | 7.5 | 38 |
| 12 | Male | 22 | 20.5 |  |  | 6.0 | 39 |
| 15 | Female | 20 | 23 |  |  | 8.2 | 39 |
| 17 | Female | 12 | 15 |  |  | 9.5 | 45 |
| 15 | Female | 10 | 12 |  |  | 8.5 | 42 |
| 15 | Female | 9 | 11 |  |  | 7.5 | 46 |
| 13 | Male | 6 | 9 |  |  | 8.5 | 46 |
| 14 | Male | 7 | 8 |  |  | 7.5 | 42 |
| 14 | Male | 8 | 12 |  |  | 6.5 | 42 |
| 15 | Male | 9 | 11 |  |  | 8 | 45 |
| 18 | Female | 13 | 14 |  |  | 9 | 45 |
| 15 | Female | 11 | 10 |  |  | 8 | 48 |
| 14 | Female | 10 | 13.5 |  |  | 8 | 48 |
| 13 | Female | 9 | 10 |  |  | 8 | 41 |

**Table S1(Continued). Data on Age, Sex, Cobb Angle, Ultrasound Coronal Angle, and Measurement Time of Included Subjects.**

| Years | Gender | Cobb angle(°) | Ultrasound curve angle(°) | Operator | | Measurement time (min) | |
| --- | --- | --- | --- | --- | --- | --- | --- |
|  |  |  |  | Operator A | Operator  B | UCA(min) | Cobb(min) |
| 14 | Female | 8 | 9.5 |  |  | 9 | 45 |
| 14 | Female | 10 | 10.5 |  |  | 11 | 35 |
| 12 | Female | 12 | 13.5 |  |  | 9.8 | 38 |
| 13 | Female | 13 | 13.5 |  |  | 11 | 37 |
| 15 | Male | 10 | 12.9 |  |  | 10.5 | 39 |
| 14 | Male | 10 | 11.2 |  |  | 10 | 39 |
| 13 | Male | 15 | 17.2 |  |  | 15 | 37 |
| 15 | Male | 16 | 18.3 |  |  | 12 | 38 |
| 15 | Female | 14 | 13.1 |  |  | 11.5 | 39 |
| 14 | Female | 17 | 18.2 |  |  | 10 | 45 |
| 15 | Female | 16 | 17.2 |  |  | 8 | 39 |
| 17 | Female | 18 | 19.9 |  |  | 7 | 38 |
| 14 | Female | 17 | 18.6 |  |  | 8.5 | 37 |
| 14 | Female | 19 | 19.1 |  |  | 8.5 | 35 |
| 15 | Female | 29 | 32 |  |  | 9 | 35 |
| 18 | Female | 5 | 9 |  |  | 8.5 | 36 |
| 15 | Male | 7 | 8 |  |  | 11 | 36 |
